# Supplementary material for: Nano-Confined Tin Oxide in Carbon Nanotube Electrodes via Electrostatic Spray Deposition for Lithium-Ion Batteries
Source: MDPI journal article supplement (doi:10.3390/ma15249086), 2022-12-19
Supplement: s1 [file s1]

## Supplementary Information

### Nano-Confined Tin Oxide in Carbon Nanotube Electrodes via Electrostatic Spray Deposition for Lithium-Ion Batteries

Alexandra Henriques<sup>a1</sup>, Amin Rabiei Baboukani<sup>a1</sup>, Borzooye Jafarizadeh<sup>1</sup>, Azmal Huda  
Chowdhury<sup>1</sup>, and Chunlei Wang<sup>1,2\*</sup>

<sup>1</sup>Department of Mechanical and Materials Engineering, Florida International University,  
Miami, FL 33174, USA

<sup>2</sup>Center for the Study of Matter at Extreme Conditions (CeSMEC), Florida International  
University, Miami, FL 33199, USA

\*wangc@fiu.edu (C. Wang)

<sup>a</sup>A.H. and A.R.B. have equal contributions in this paper.

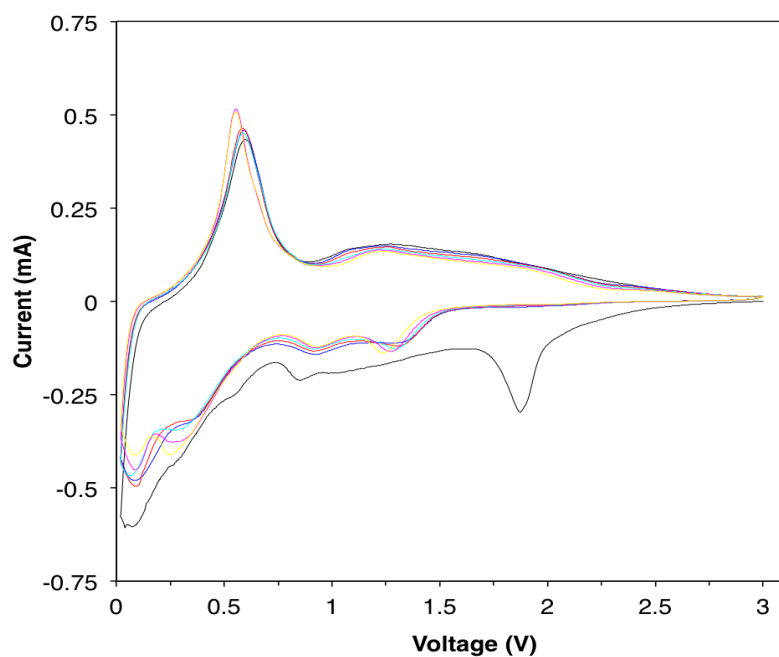

Figure S1: Cyclic voltammetry of SnO<sub>2</sub> alone in the voltage window of 0.01-3.0 V

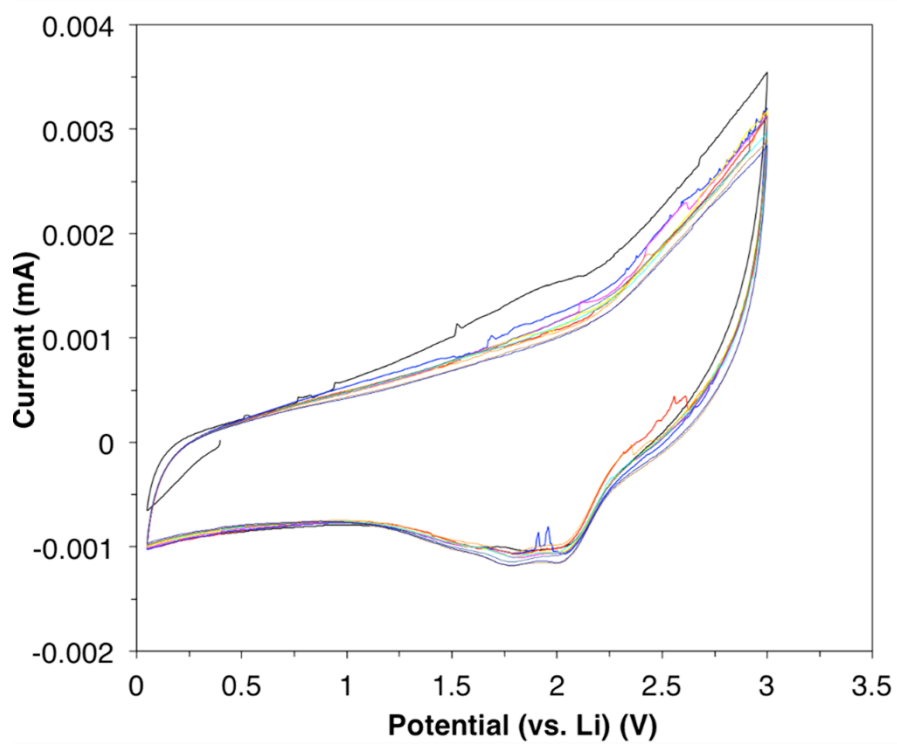

Figure S2: Cyclic voltammetry of CNT alone in the voltage window of 0.01-3.0 V

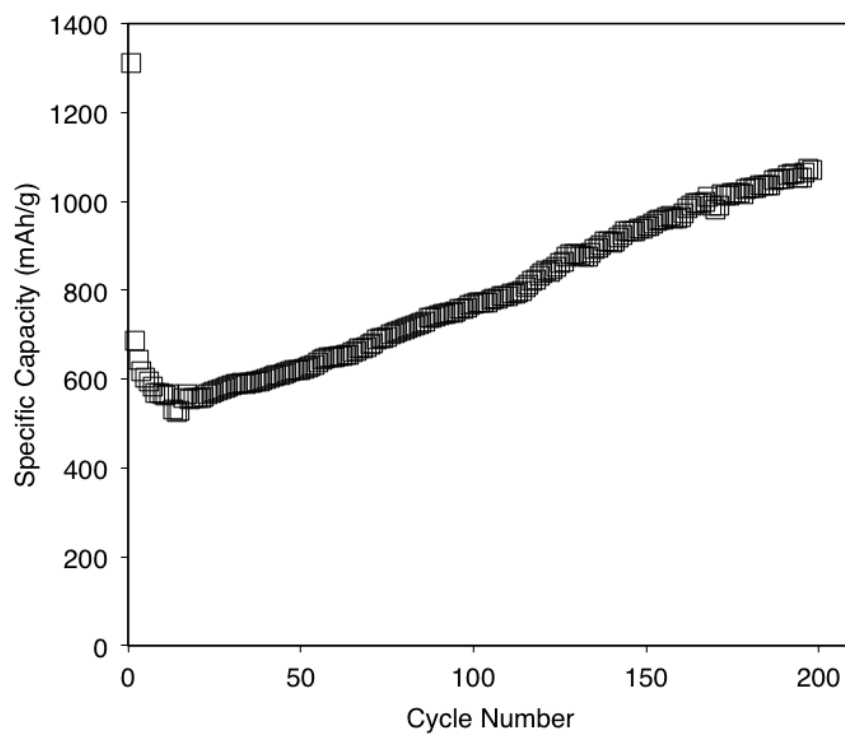

Figure S3: Cycle performance of 20% SnO<sub>2</sub>-in-CNT for 200 cycles at 100 mAhg<sup>-1</sup>
